# Supplementary material
Source: PubMed Central journal article supplement (PMC552903)
Supplement: pnas_102_9_3441__1.pdf [file pnas_102_9_3441__1.pdf]

### 3' cRNA rBDVc

TGTTGCTTTGTTGTAGCGCAACACCCCCC  
TGTTGCTTTGTTGTAGCGCAACACCCCCC  
TGTTGCTTTGTTGTAGCGCAACACCCCCC  
TGTTGCTTTGTTGTAGCGCAACACCCCCC  
TGTTGCTTTGTTGTAGCGCAAACACCCCCC  
TGTTGCTTTGTTGTAGCGCAACCGCTCCCC  
TGTTGCTTTGTTGTACCNACA-CCCCC  
TGTTGCTTTGTTGTAGCGCAACACCCCCC

### 3' cRNA rBDVnc

TGTTGCTTTGTTGTAGCGC-----CCCCC  
TGTTGCTTTGTTGGACCNCAAAAACCCCCC  
TGTTGCTTTGTTGTAGCGCAA--CCCCC  
TGTTGCTTTGTTGTAGCGCAA-CCCCC  
TGTTGCTTTGTTGGACCT-----CCCCC  
TGTTGCTTTGTTGTAGCGC-----CCCCC  
TGTTGCTTTGTTGTAGCGCA---CCCCC  
TGTTGCTTTGTTGTAGCGCAA-CCCCC
