# Supplementary material
Source: PubMed Central journal article supplement (PMC552903)

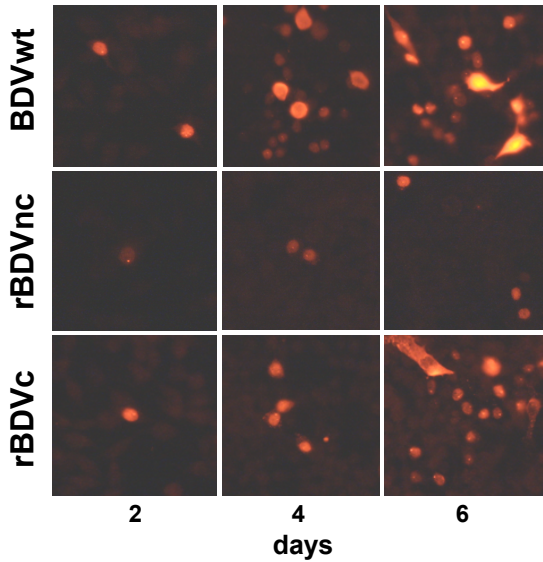

Supplement: pnas_102_9_3441__2.pdf [file pnas_102_9_3441__2.pdf]
